# Supplementary material for: The Clustered Gamma Protocadherin Pcdhγc4 Isoform Regulates Cortical Interneuron Programmed Cell Death in the Mouse Cortex
Source: PubMed Central journal article supplement — bioRxiv. 2023 Feb 6:2023.02.03.526887. Preprint. [Version 2] doi: 10.1101/2023.02.03.526887 (PMC9915683; doi:10.1101/2023.02.03.526887), 2023-02-06
Supplement: NIHPP2023.02.03.526887v2-supplement-1.pdf [file NIHPP2023.02.03.526887v2-supplement-1.pdf]

## Figure 2 Supplement

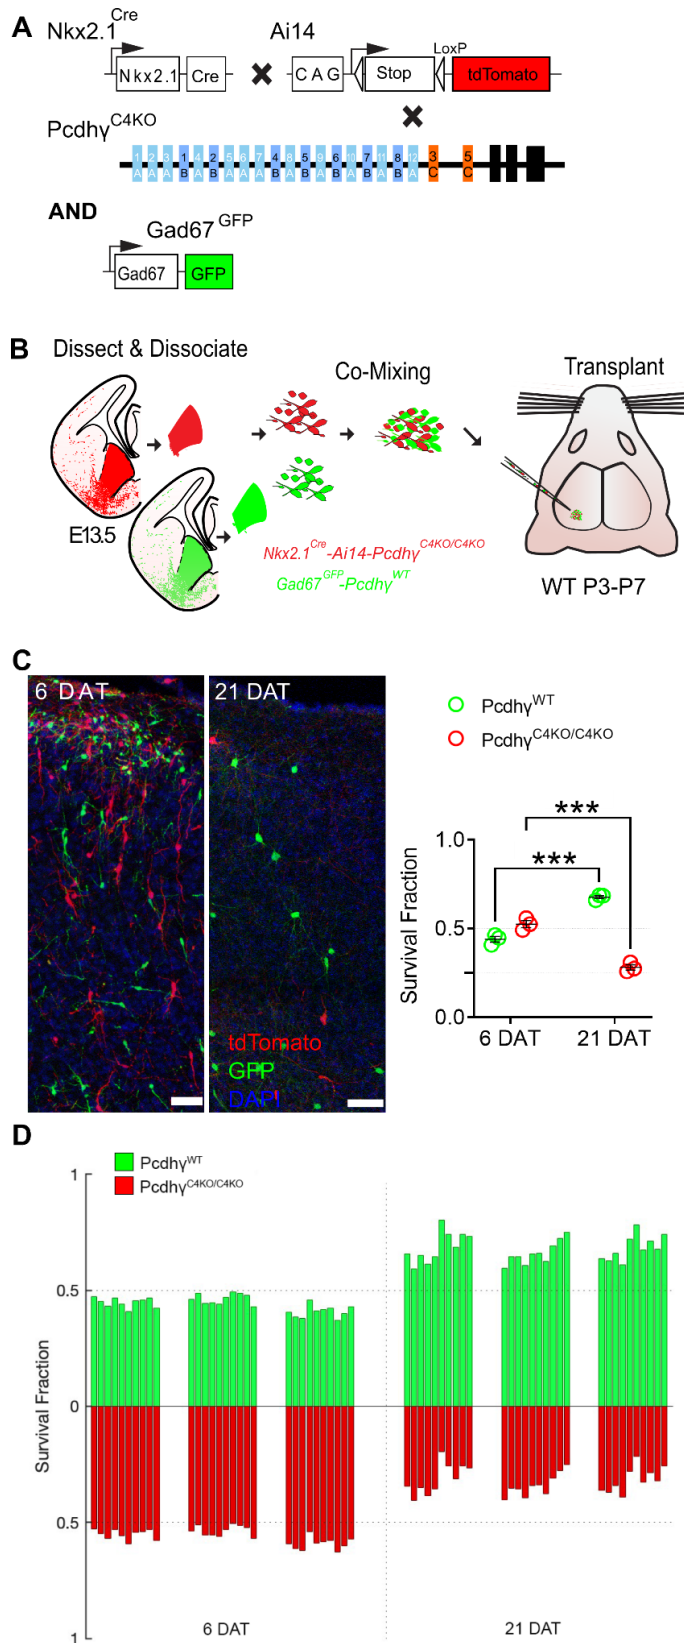

**Figure 2 Supplement - Genetic deletion of Pcdhyc4 increased cell death in MGE-derived cINs.**

**A.** Diagram of genetic crosses. Pcdhy<sup>C4KO</sup> homozygous MGE cells were labeled via the MGE-specific genetic reporter *Nkx2.1<sup>Cre</sup>* mice that also carry the conditional Ai14 allele. Control Pcdhy<sup>WT</sup> MGE cells were labeled with GFP via the Gad67-GFP report mice.

**B.** Schematics of transplantation protocol. The MGEs of Pcdhy<sup>C4KO</sup> homozygous mutant or control E13.5 embryos were dissected, dissociated, and mixed in similar proportions. The mixture of GFP+ (Pcdhy-WT) and tdTomato+ (Pcdhy<sup>C4KO/C4KO</sup>) cells were grafted into the cortex of WT neonate mice.

**C.** Left - Confocal images from the cortex of 6 and 21 DAT mice. The transplanted cells were labeled with GFP (Pcdhy<sup>WT</sup>) or tdTomato (Pcdhy<sup>C4KO/C4KO</sup>). Right - Quantifications (shown as survival fraction) of surviving GFP or tdTomato labeled MGE-derived cINs at 6 and 21 DAT. Both the GFP and tdTomato labeled cells undergo programmed cell death between 6 and 21DAT, but Pcdhy<sup>C4KO/C4KO</sup> cells are eliminated at higher rates.

**D.** Survival fraction quantification from (C) shown by the brain section (each bar) and separated by animals at 6 and 21 DAT.

Scale bar = 50 um, Nested-ANOVA, \*\*\*p = 0.0002 , n = 3 mice per time point and 10 brain sections quantified per mouse.

### Figure 3 supplement

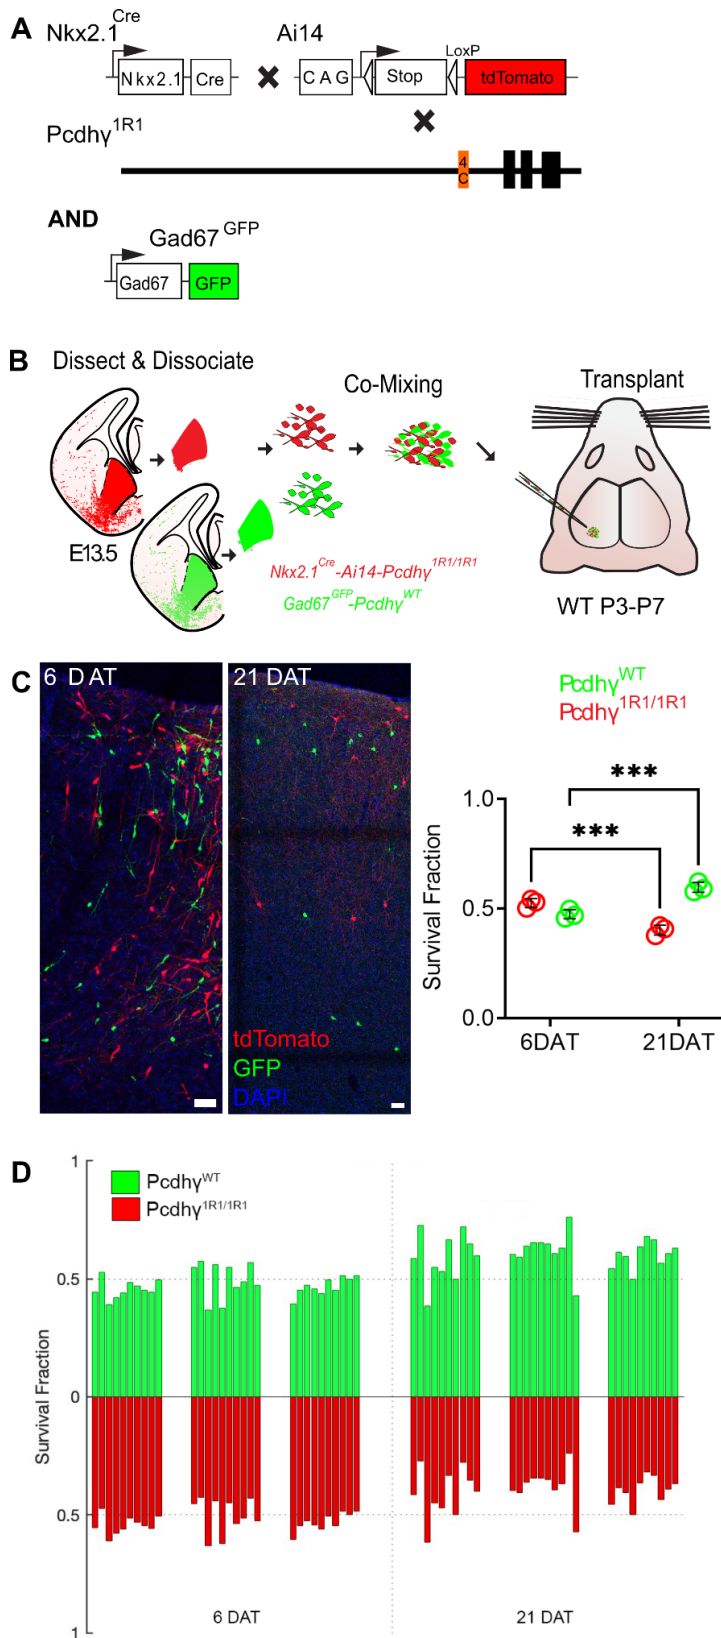

**Figure 3 - supplement - Expression of Pcdhyc4 is sufficient for the survival of most MGE-derived cINs.**

**A.** Diagram of genetic crosses between MGE/POA-specific reporter *Nkx2.1<sup>Cre</sup>;Ai14* and *Pcdhy<sup>1R1</sup>* mice. Control cells were obtained from *Gad67-GFP* embryos.

**B.** Schematics of transplantation protocol. The MGEs from E13.5 *Pcdhy<sup>1R1</sup>* homozygous or control embryos were dissected, dissociated, and mixed in similar proportions. The mixture of GFP+ (*Pcdhy<sup>WT</sup>*) and tdTomato+ (*Pcdhy<sup>1R1/1R1</sup>*) cells was grafted into the cortex of WT neonate mice.

**C.** Left - Confocal images from the cortex of 6 and 21 DAT mice. The transplanted cells are labeled with GFP (*Pcdhy<sup>WT</sup>*) or tdTomato (*Pcdhy<sup>1R1/1R1</sup>*). Right - Quantifications (shown as survival fraction) of surviving MGE-derived cINs at 6 and 21 DAT. Both the transplanted GFP and tdTomato-labeled cells undergo programmed cell death between 6 and 21 DAT, but the *Pcdhy<sup>1R1/1R1</sup>* cells are eliminated at higher rates.

**D.** Survival fraction quantification from (C) shown by the brain section (each bar) and separated by animals at 6 and 21 DAT.

Scale bar = 50 um, Nested-ANOVA , \*\*\*p = 0.009 , n = 3 mice per time point and 10 brain sections per mouse

Figure 4 supplement 2

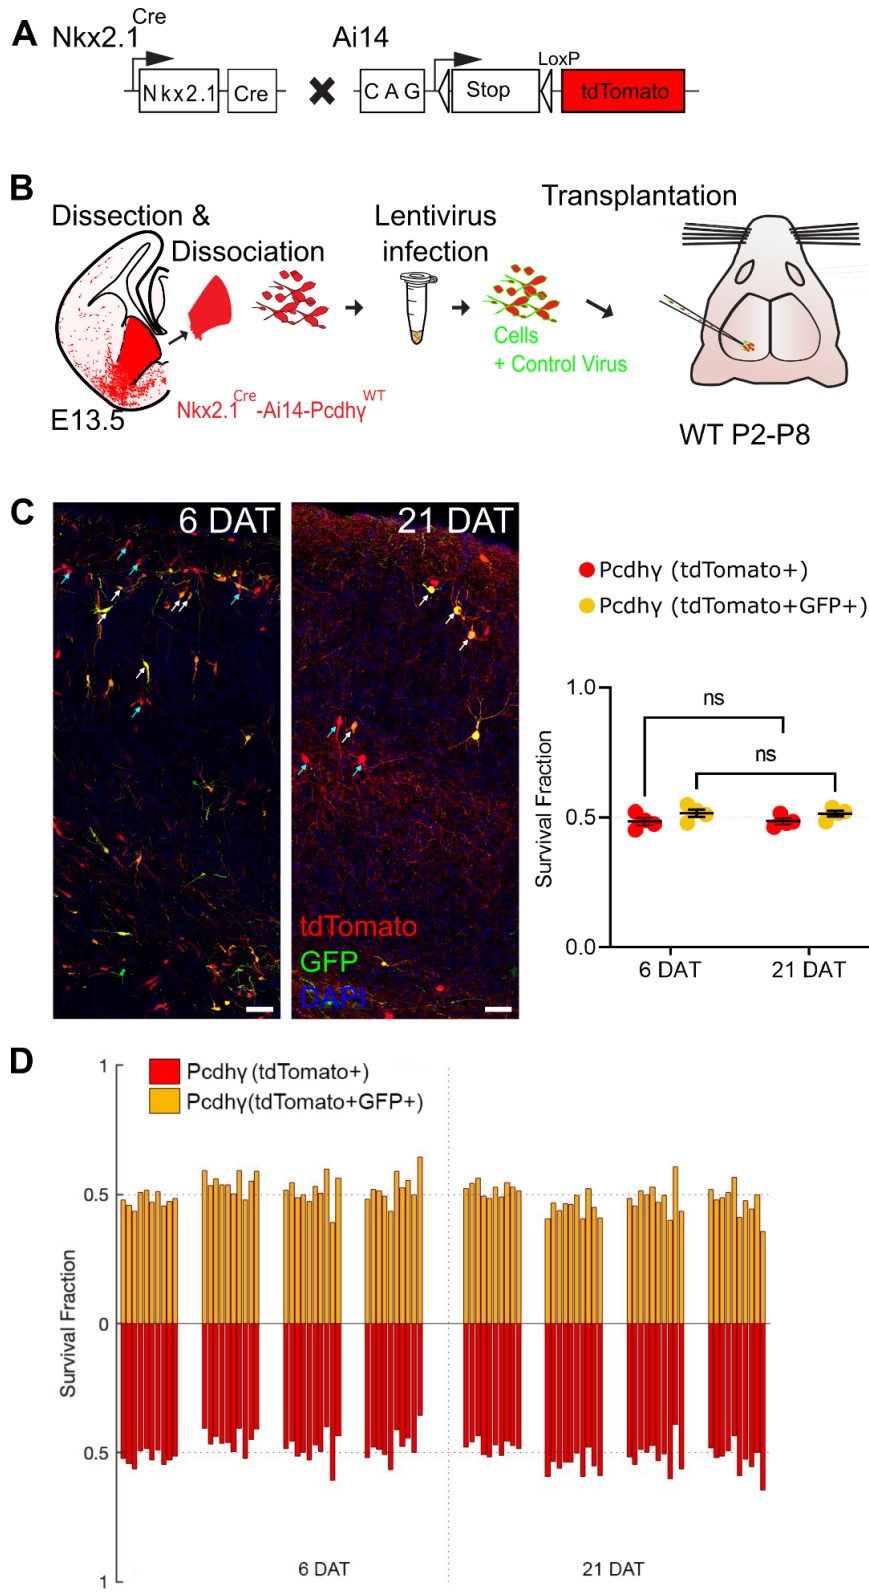

**Figure 4 supplement - Infection with lentivirus and expression of GFP does not affect the survival of cINs**

**A** Diagram of mouse crosses to obtain  $Pcdhy^{WT}$  MGE cells labeled with MGE-specific genetic reporter.

**B.** Schematic of lentiviral infection and transplantation of MGE cIN precursors. The MGEs of  $Nkx2.1^{Cre}$ -Ai14 embryos that carry  $Pcdhy^{WT}$  were dissected, dissociated, and infected in suspension with lentivirus expressing GFP. The infected cells were grafted into the cortex of WT recipient mice P0-P8.

**C.** Confocal acquired images of the transplanted cINs in the cortex at 6 and 21 DAT. Notice that all transplanted cells are labeled with tdTomato (red), while cells expressing virally-driven GFP are labeled in green. Quantifications of the tdTomato+ only (teal arrows) or tdTomato+GFP+ (yellow cells, white arrows) cells are shown as the fraction of cells from the total tdTomato+ cells at 6 and 21 DAT.

**D.** Survival fraction quantification from (C) shown by the brain section (each bar) and separated by animals at 6 and 21 DAT.

Scale bar = 50  $\mu$ m, Nested-ANOVA, ns = not significant, n = 4 mice per time point and 10 brain sections per mouse from one transplant cohort.
